# High-throughput colocalization pipeline quantifies efficacy of mitochondrial targeting signals across different protein types

Sierra K. Lear<sup>1,2</sup>, Jose A. Nunez<sup>3</sup>, & Seth L. Shipman<sup>1,4,5</sup>

<sup>1</sup>Gladstone Institute of Data Science and Biotechnology, San Francisco, CA, USA

<sup>2</sup>Graduate Program in Bioengineering, University of California, San Francisco and Berkeley, CA, USA

<sup>3</sup>Department of Mechanical Engineering, University of California, Santa Barbara, CA, USA

<sup>4</sup>Department of Bioengineering and Therapeutic Sciences, University of California, San Francisco, CA, USA

<sup>5</sup>Chan Zuckerberg Biohub – San Francisco, San Francisco, CA, USA

Correspondence to: [seth.shipman@gladstone.ucsf.edu](mailto:seth.shipman@gladstone.ucsf.edu)

1 **ABSTRACT**

2 Efficient metabolic engineering and the development of mitochondrial therapeutics often rely upon  
3 the specific and strong import of foreign proteins into mitochondria. Fusing a protein to a  
4 mitochondria-bound signal peptide is a common method to localize proteins to mitochondria, but  
5 this strategy is not universally effective with particular proteins empirically failing to localize. To  
6 help overcome this barrier, this work develops a generalizable and open-source framework to  
7 design proteins for mitochondrial import and quantify their specific localization. By using a  
8 Python-based pipeline to quantitatively assess the colocalization of different proteins previously  
9 used for precise genome editing in a high-throughput manner, we reveal signal peptide-protein  
10 combinations that localize well in mitochondria and, more broadly, general trends about the overall  
11 reliability of commonly used mitochondrial targeting signals.

12 **KEYWORDS**

13 subcellular localization, protein engineering, mitochondria, high-throughput imaging, digital  
14 image analysis, Python

## 15 INTRODUCTION

16 Synthetic biologists increasingly leverage natural mitochondrial protein import pathways for  
17 compartmentalized metabolic engineering<sup>1,2</sup> and the development of molecular therapeutics<sup>3,4</sup>. For  
18 metabolic engineering, sequestering enzymes within yeast mitochondria has resulted in a ~300-  
19 fold increase in production of high-value biosynthetic compounds<sup>5,6</sup>. In human health, emerging  
20 mitochondrial therapeutics address a major unmet need since mutations to mitochondrial DNA  
21 (mtDNA) are at the root of numerous incurable diseases that affect over 1 in 5000 individuals<sup>7,8</sup>.  
22 In search of cures, researchers are exploring both allotopic expression, where corrected  
23 mitochondrial genes are expressed from the nuclear genome and sent to the mitochondria<sup>9</sup>, and  
24 gene editing, where mutated mtDNA is either depleted by nucleases or corrected by base editors<sup>10-  
25 18</sup>.

26  
27 All of these approaches require efficient targeting of proteins of interest (POIs) to the  
28 mitochondria. The most common strategy to achieve such localization is by fusing a mitochondrial  
29 targeting sequence (MTS), typically a short and positively charged signal peptide, to the N-  
30 terminus of the POI. MTSs are recognized by translocases on the outer and inner mitochondrial  
31 membrane (TOM/TIM23 complex) that unfold the POI, import it through both mitochondrial  
32 membranes, and release the protein into the mitochondrial matrix following cleavage of the N-  
33 terminus MTS from the POI<sup>19,20</sup>. Hundreds of putative MTSs have been identified from natural  
34 proteins using computational tools<sup>21-24</sup>.

35  
36 However, attachment of an individual MTS to a given POI does not always guarantee efficient  
37 import into mitochondria<sup>25,3</sup>. In fact, allotopic expression and gene editing approaches in  
38 mammalian mitochondria have been hindered by low or non-specific POI localization. For  
39 instance, only a small sub-selection of protein subunits typically encoded in mtDNA are able to be  
40 allotopically expressed in mammalian cells<sup>26,27</sup>. Moreover, even when proteins are imported to  
41 mammalian mitochondria, they can also accumulate in other organelles<sup>28</sup>. For mitochondrial gene  
42 editing, such imprecise localization poses danger; for example, the mitochondrial base editor  
43 DdCBE<sup>16</sup> has substantial off-target editing in nuclear DNA<sup>29</sup>, highlighting the need for more  
44 specific import of genome editing-related proteins to mitochondria.

45  
46 Previous studies in yeast suggest that length, hydrophobicity, charge, and folding of the MTS or  
47 POI can all affect the efficiency of mitochondrial import<sup>30-32,19</sup>. However, research in mammalian  
48 cells is much sparser and at present a given MTS-POI combination cannot be assumed to result in  
49 reliable mitochondrial import. Instead, researchers often empirically test multiple MTSs before  
50 finding one that results in their specific POI localizing in mitochondria<sup>33,15</sup>.

51  
52 To address a relative lack of broad experimental data and help establish a quantitative assessment  
53 of mitochondrial localization in mammalian cells, we developed a quantitative and high-  
54 throughput imaging-based pipeline to measure POI import into mitochondria. Using this platform,  
55 we screened combinations of three commonly used N-terminus MTSs and POIs from five protein  
56 families relevant to mitochondrial gene editing to reveal the most reliable MTS-POI combinations.

## 57 RESULTS

58

### 59 High-throughput Localization Workflow

60 To investigate the effect of MTS on mitochondrial import across different POIs, we generated 66  
61 protein cassettes containing a combination of localization signal and POI, followed by a HA tag  
62 on the C-terminus (**Fig 1a**). Localization signals included three commonly used MTSs—COX8  
63 (29 amino acid-long peptide derived from human cytochrome c oxidase subunit VIII)<sup>34</sup>, Su9 (69  
64 amino acid-long peptide derived from *Neurospora crassa* ATPase subunit 9)<sup>35</sup>, and ATG4D (42  
65 amino acid-long peptide derived from a Atg4 cysteine protease)<sup>36</sup>—that were previously used to  
66 probe the import of CRISPR nucleases into mammalian mitochondria<sup>15</sup>. The use of no localization  
67 signal or a nuclear localization signal (NLS) served as negative controls. Nineteen POIs were  
68 chosen across five different protein classes that have been used as components of precise gene  
69 editing technologies: Class I CRISPR systems (Cas3/CASCADE)<sup>37</sup>, Class II CRISPR/Cas  
70 nucleases, RecTs, single-stranded binding proteins (SSBs), and retron reverse transcriptases (RTs).  
71 Both Class I and II CRISPR systems can cut DNA at programmable sites to induce editing using  
72 double-stranded break (DSB) repair pathways<sup>38</sup>. In contrast, RecTs and SSBs have been used to  
73 integrate donor DNA into bacterial and yeast genomes through recombineering<sup>39–42</sup>. Finally, retron  
74 RTs allow *in vivo* production of DNA donor editing templates in both prokaryotes and eukaryotes  
75 that mediate precise editing using either DSB repair pathways or recombineering<sup>43–46</sup>. As a positive  
76 control, we used the construct mito-APEX2, a protein that contains an MTS derived from the  
77 mitochondrially imported COX4 fused to APEX2, which has been shown to localize to the  
78 mammalian mitochondrial matrix using immunocytochemistry and proteomic mapping that found  
79 mito-APEX2 in close proximity to mitochondrial matrix proteins<sup>47</sup>.

80

81 To engineer mammalian cell lines expressing a given protein cassette, each construct was cloned  
82 into a PiggyBac vector under the control of a doxycycline-inducible promoter adjacent to a  
83 constitutive puromycin resistance gene. These cassettes were randomly integrated into the genome  
84 of HEK293T cells using the PiggyBac transposase system and selected with puromycin (**Fig 1b**).  
85 Biological replicates of a given construct were defined as either individual clones derived from a  
86 single bulk transposase integration or multiple parallel transposase integrations. We screened the  
87 localization of each cassette by seeding cells into 96-well plates, expressed each protein for 24  
88 hours under an inducible promoter, performed immunocytochemistry, and imaged each well using  
89 a high-throughput confocal microscope (ImageXpress Micro Confocal High-Content Imaging  
90 System). Specifically, each cell line was imaged for nuclei using Hoechst, POI using an antibody  
91 against HA, and mitochondria using an antibody against the mitochondrial marker TIM23 (**Fig**  
92 **1c**). Using this high-throughput method, we found that localization of some cassettes varied  
93 qualitatively depending on localization signal. For instance, while the mito-APEX2 and Su9-  
94 LbCas12a showed punctate expression that colocalizes with mitochondria, NLS-LbCas12a  
95 showed clear nuclear colocalization and LbCas12a with no localization signal showed a diffuse,  
96 cytoplasmic phenotype. While these particular lines illustrate the expected localization based on  
97 signal, the localization of many other cassettes, such as of ATG4D-LbCas12a, were less  
98 predictable or more ambiguous. Thus, we next developed an analytical pipeline to quantify  
99 localization within mitochondria or nuclei.

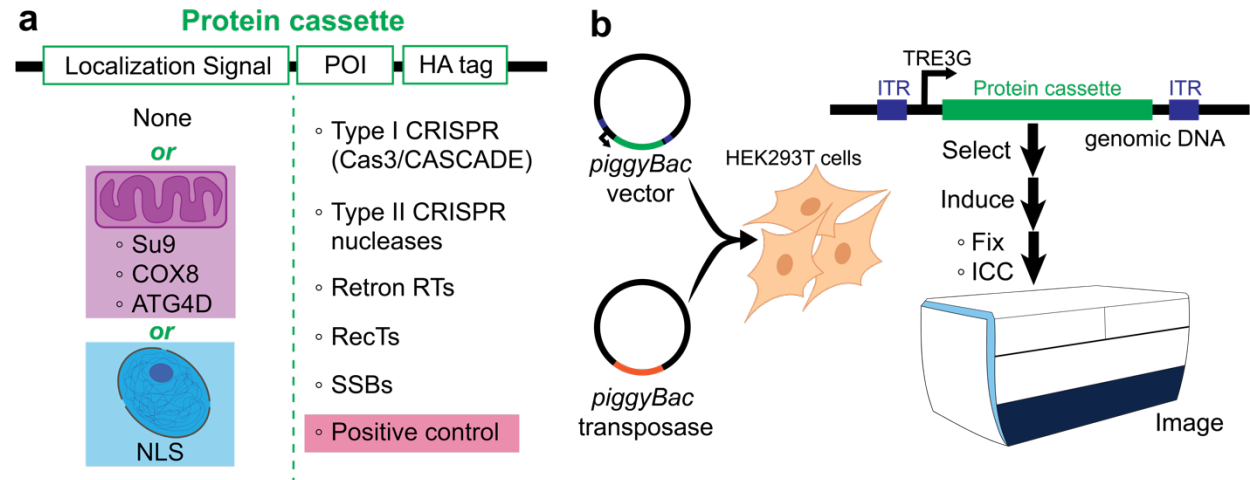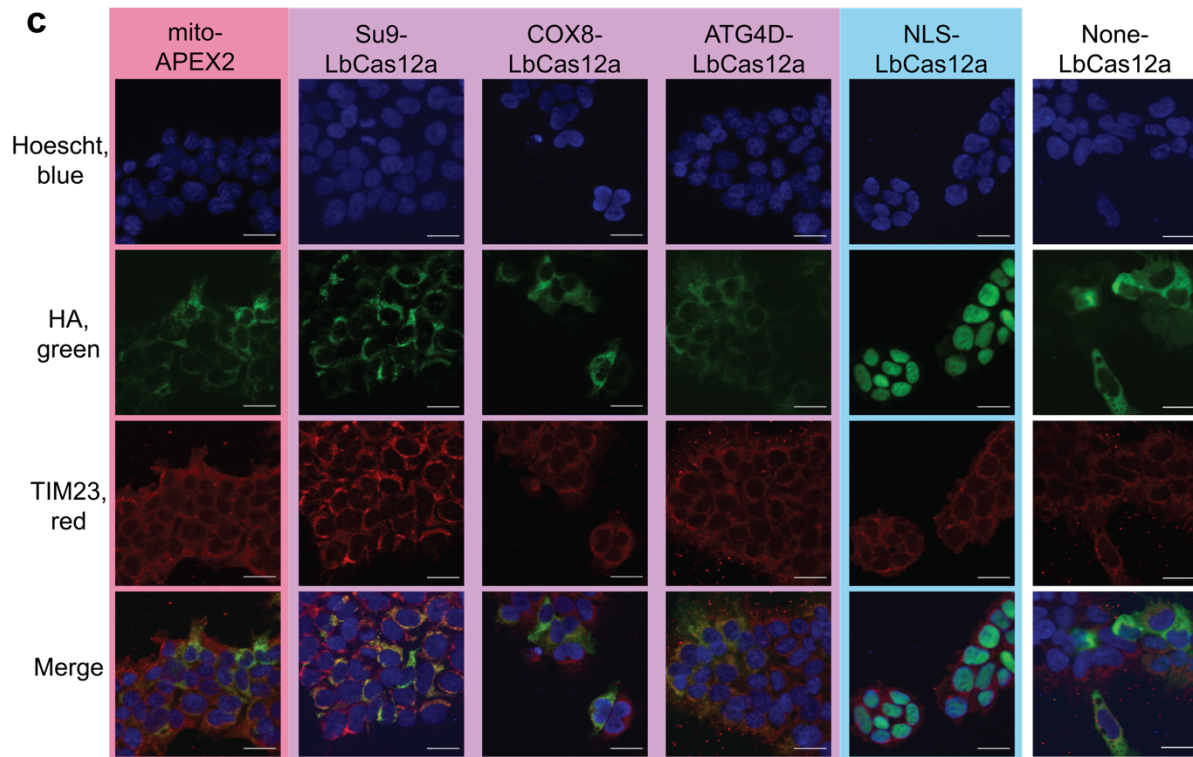

scale bar = 25  $\mu$ m

100  
 101 **Figure 1.** High-throughput localization workflow. (a) 66 genetic cassettes containing a combination of  
 102 localization signal and POI, followed by a C-terminus HA tag, were synthesized. Localization signals include  
 103 three N-terminus MTSs (Su9, COX8, and ATG4D), a nuclear localization signal (NLS), or no localization tag  
 104 (None). POIs were chosen from five different protein families—Class I CRISPR/Cas proteins, Class II CRISPR  
 105 nucleases, retron RTs, RecTs, and SSBs. A positive control of mito-APEX2 was also included. (b) Each cassette  
 106 was randomly integrated into the genome of HEK293T cells using a piggyBac transposase system. Following  
 107 co-transfection of the cassette in a piggyBac vector and a plasmid constitutively expressing piggyBac  
 108 transposase, cells were selected for at least one week using the antibiotic puromycin. To image each cell line,  
 109 expression of a given cassette was induced for 24 hours using doxycycline before being fixed and stained prior

110 to imaging using a high-throughput confocal microscope (ImageXpress Micro Confocal High-Content Imaging  
111 System). (c) Engineered cell lines were stained with Hoescht (blue), an antibody against HA (green), and an  
112 antibody against the mitochondrial marker TIM23 (red). Shown are representative images from the positive  
113 control (red background) and LbCas12a fused to one of three MTSs (purple), NLS (blue), or no localization tag  
114 (white).

115

116

### 117 **Automated, quantitative, and open-source analysis pipeline**

118 To better compare localization differences exhibited by MTS-POI combinations, we developed an  
119 unbiased Python-based analysis pipeline to quantify the mitochondrial and nuclear import between  
120 our dozens of cassettes. Crucially, we found that expression and localization were variable between  
121 individual cells of a given condition so our analysis pipeline is built to quantify colocalization at  
122 the level of single cells. Images corresponding to the nuclei and mitochondria for each biological  
123 replicate cell line from each condition were fed into a Cellpose-based machine learning model<sup>48,49</sup>  
124 to label individual cells (**Fig 2a,b**). Next, cells were filtered using Otsu thresholding to remove  
125 any cells with no detectable protein expression (**Fig 2c**). Specifically, Otsu thresholding was  
126 applied on each image to determine the pixel intensity threshold separating POI signal from  
127 background fluorescence. This analysis also revealed that some images had such low fluorescence  
128 that signal was effectively indistinguishable from noise. To ensure these specific images did not  
129 bias the final colocalization scores, any images in which Otsu thresholding did not separate signal  
130 from noise in each cell, as defined by the majority of filtered cells in an image failing to show a  
131 non-Gaussian intensity distribution typical of true fluorescent signal, were discarded (**Fig S1**). In  
132 some cases, only a few images for a cell line were eliminated, although—in cases where a clonal  
133 or transfected line suffered from minimal cassette expression—the entire biological replicate was  
134 removed from analysis.



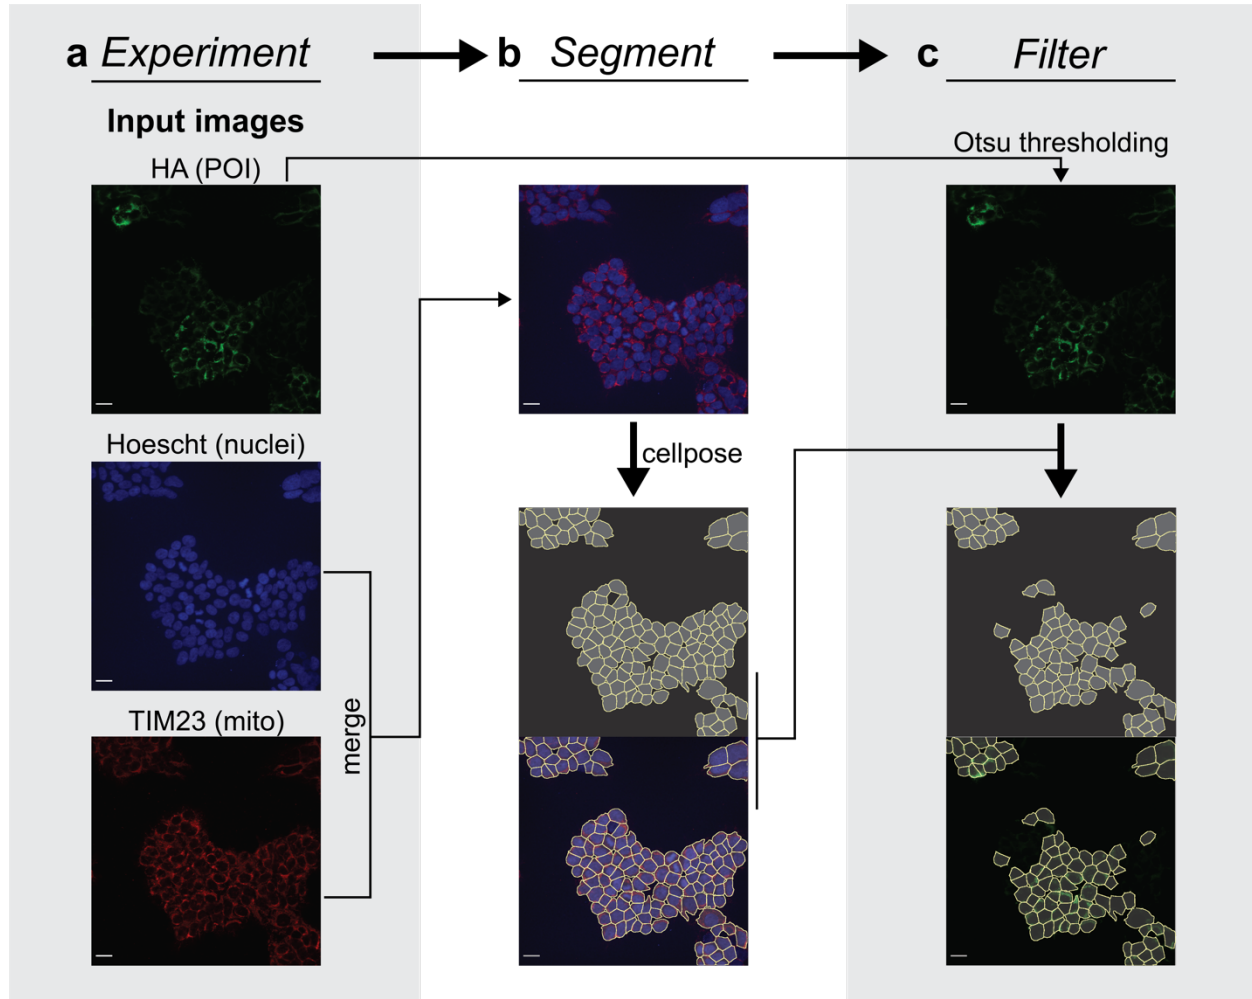

135  
136 **Figure 2.** Machine learning algorithm enables automated labeling of cells containing cassette protein. Scale bar  
137 = 25  $\mu\text{m}$ . **(a)** Unprocessed images from each fluorescent channel are fed into a Python-based analysis pipeline  
138 to segment individual cells. Shown are representative images from the cell line Su9-LbCas12a (top, HA; middle;  
139 Hoescht, bottom; TIM23). **(b)** The Hoescht and TIM23 channels are merged (top) prior to being fed into a  
140 custom, retrained neural network (arrow), resulting in automated labeling of each cell found within the image.  
141 Images below arrow; top image shows Cellpose-generated mask of segmented cells, where each yellow line  
142 indicates a cell boundary. Bottom image shows mask overlaid atop merged Hoescht/TIM23 channels. **(c)**  
143 Cellpose-segmented cells are filtered to keep only cells which express the cassette protein. Otsu thresholding is  
144 applied to the HA channel (top) to determine a threshold separating true fluorescent signal from background  
145 noise. Segmented cells containing at least 50 pixels with signal are kept to perform further colocalization  
146 measurements. Images below arrow; top image shows segmented cells following filtering. Bottom image shows  
147 filtered mask overlaid atop HA channel.  
148

149 After selecting a population of filtered cells to further analyze for a given protein cassette,  
150 colocalization between the cassette protein and either mitochondria (**Fig 3a,b**) or nuclei (**Fig 3d,e**)  
151 was measured on a per cell basis using Pearson's correlation coefficient (PCC)<sup>50</sup>. Using this  
152 method, PCC scores vary between -1 (anti-correlated) to +1 (highly correlated). High  
153 colocalization scores indicate that a protein is collocated with a given organelle while low  
154 colocalization scores suggest little to no specific colocalization between a POI and a given  
155 organelle occurred.  
156

157 For our analysis, we considered individual cells that survived quality filters from a single  
158 transfection or clone as technical replicates and summarized the overall colocalization score for a  
159 single biological replicate of each protein cassette by taking the median of all the individual cell  
160 colocalization scores for mitochondria (**Fig 3c**) or nuclei (**Fig 3f**). We replicated our experiments  
161 using at least three different transfections or five clonal lines as biological replicates.

162  
163 We generally found low variability within our biological replicates, suggesting that protein import  
164 is a fairly reliable phenomenon. The positive control mito-APEX2 obtained an average score of  
165 0.63 +/- 0.03 (mean +/- std. dev), a high PCC value that strongly implies mito-APEX2 is imported  
166 into the mitochondrial matrix. Similar to our previous qualitative assessments (**Fig 1c**), we found  
167 that colocalization scores, even across a single POI, vary depending on localization signals. The  
168 colocalization scores of LbCas12a fused to the Su9 or COX8 MTSs were not statistically different  
169 from mito-APEX2, suggesting mitochondrial import had occurred. In comparison, when  
170 LbCas12a was instead fused to ATG4D, no localization signal, or NLS, colocalization scores  
171 dropped significantly, indicating less mitochondrial import occurred (**Fig 3g**). Moreover, when  
172 comparing nuclear colocalization scores (**Fig 3h**), all cell lines except NLS-LbCas12a showed a  
173 consistent, low nuclear colocalization score, suggesting little to no nuclear import. As expected,  
174 only the cell line fused to a NLS had a high colocalization score indicating high nuclear import.  
175 These findings suggest that our workflow is able to compare import efficiencies across different  
176 combinations of MTS and POI for multiple organelles.



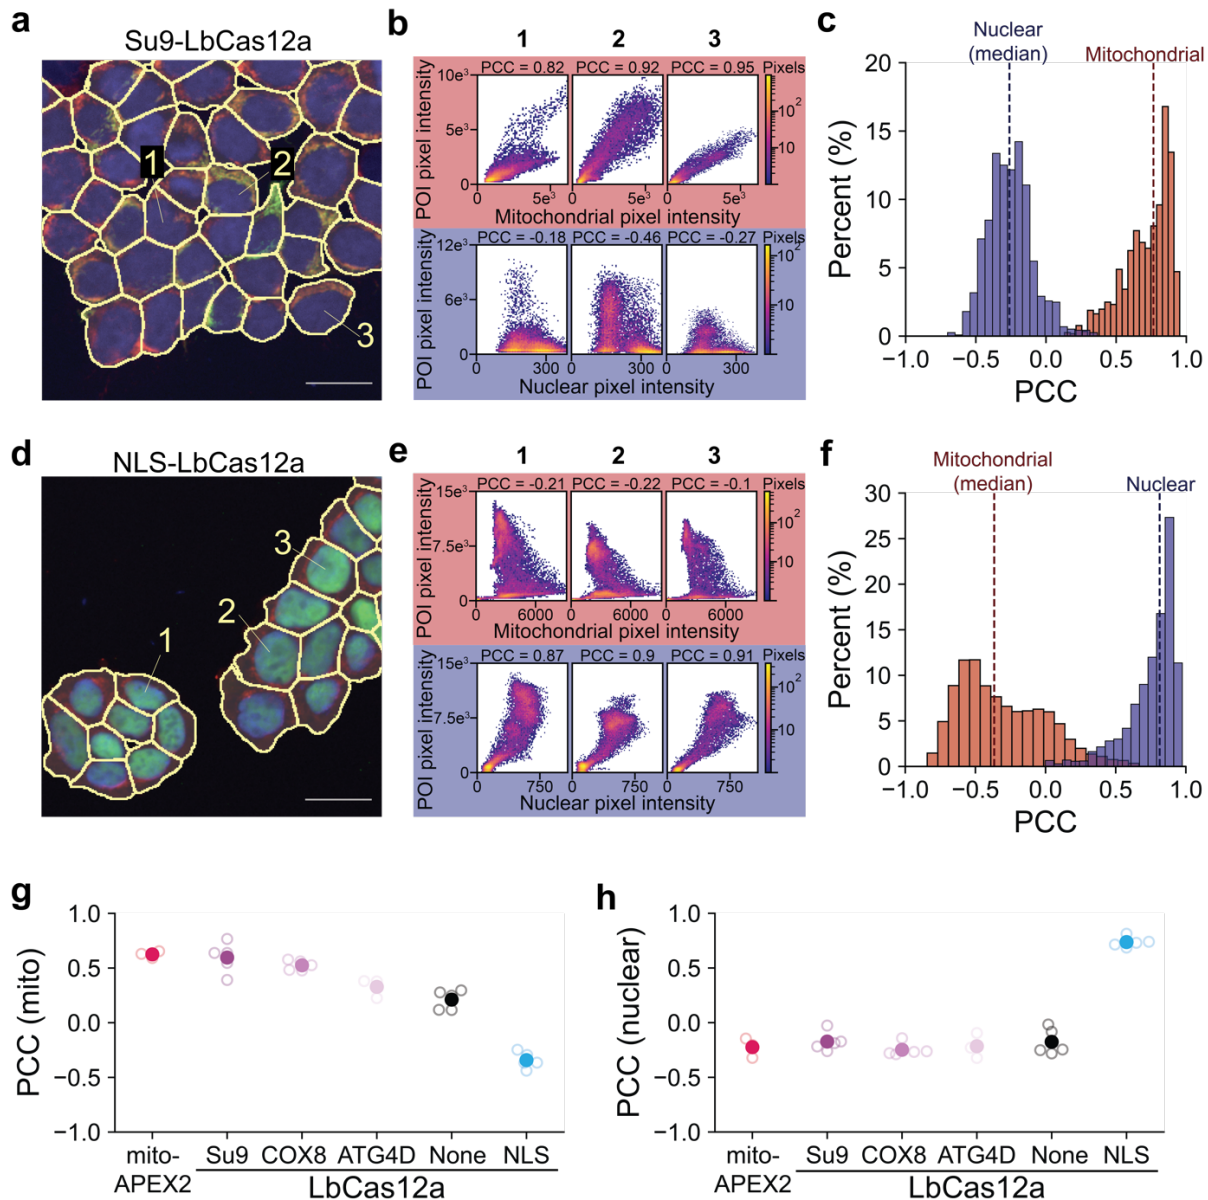

177  
 178 **Figure 3.** Computational workflow quantifies the colocalization of cassette proteins with mitochondria or nuclei.  
 179 **(a)** Representative image of a cell line (Su9-LbCas12a) with clear mitochondrial expression of its cassette  
 180 protein, with mask in yellow overlaid on top. Numbers refer to three representative cells for which data is shown  
 181 in **(b)**. Scale bar = 25  $\mu$ m. **(b)** Heatmaps depicting the relationship between Su9-LbCas12a pixel intensity and  
 182 organellar pixel intensity (mitochondria on top in red; nuclei on bottom in blue) for each pixel within a  
 183 representative cell from **(a)** (left; cell #1, middle; cell #2, right; cell #3). Color depicts the number of pixels. The  
 184 strength of the linear relationship between pixel intensities, or colocalization, within each cell is calculated using  
 185 PCC, and the result depicted on top its respective heatmap. **(c)** Histogram depicting the all the colocalization  
 186 scores for all the cells for one clonal line expressing Su9-LbCas12a. Mitochondrial PCC scores are shown in  
 187 red, while nuclear PCC scores are shown in blue. Dotted lines depict the median colocalization score for  
 188 mitochondria (red) and nuclei (blue). **(d)** Representative image of a cell line (NLS-LbCas12a) with clear nuclear  
 189 expression of its cassette protein, with mask in yellow overlaid on top. Numbers refer to three representative  
 190 cells. Scale bar = 25  $\mu$ m. **(e)** Heatmaps depicting the relationship between NKS-LbCas12a pixel intensity and  
 191 organellar pixel intensity (mitochondria on top in red; nuclei on bottom in blue) for each pixel within a  
 192 representative cell from **(d)** (left; cell #1, middle; cell #2, right; cell #3). Color depicts the number of pixels. The

193 strength of the linear relationship between pixel intensities, or colocalization, within each cell is calculated using  
194 PCC, whose result is on top its respective heatmap. **(f)** Histogram depicting the all the colocalization scores for  
195 all the cells for one clonal line expressing NLS-LbCas12a. Mitochondrial PCC scores are shown in red, while  
196 nuclear PCC scores are shown in blue. Dotted lines depict the median colocalization score for mitochondria (red)  
197 and nuclei (blue). **(g)** Mitochondrial colocalization of positive control mito-APEX2 (red) and LbCas12a fused  
198 to different localization tags, as measured using the described experimental and analytic workflow. There is a  
199 significant effect of localization signal (one-way ANOVA,  $P < 0.0001$ ), where ATG4D ( $P = 0.0021$ ), no signal  
200 ( $P < 0.0001$ ), and NLS ( $P < 0.0001$ ) are all significantly different from mito-APEX2, but Su9 ( $P = 0.9831$ ) and  
201 COX8 ( $P = 0.376$ ) are not (Dunnett's corrected). Open circles are biological replicates; closed circles are average  
202 of all biological replicates. **(h)** Nuclear colocalization of mito-APEX2 (red) and LbCas12a fused to different  
203 localization tags measured using the described experimental and analytical workflow. There is a significant  
204 effect of localization signal (one-way ANOVA,  $P < 0.0001$ ), where NLS ( $P < 0.0001$ ) is significantly different  
205 from mito-APEX2, but Su9 ( $P = 0.8587$ ), COX8 ( $P = 0.9930$ ), ATG4D ( $P = 0.9998$ ), and no signal ( $P = 0.08825$ )  
206 are not (Dunnett's corrected). Open circles are biological replicates; closed circles are average of all biological  
207 replicates. Additional statistical details in Supplementary Table 1.

208

### 209 **MTS selection strongly influences mitochondrial import**

210 After validating the analytical pipeline, we used this workflow to quantify the mitochondrial and  
211 nuclear import of all 66 different protein cassettes (**Fig 4a**; **S2a,b**). Interestingly, mitochondrial  
212 colocalization scores did not cluster bimodally into high and low scores. Instead, scores were  
213 distributed continuously, suggesting that different cassettes have varying capabilities to drive POIs  
214 to the mitochondria.

215

216 Previous studies have found that both the specific MTS and hydrophobicity of individual POIs can  
217 influence the probability that a MTS-POI will localize in the mitochondria<sup>31,19,33</sup>. To determine if  
218 localization signal influences mitochondrial import across the four protein families tested, we  
219 investigated how the mitochondrial import rank of cassettes clustered based on localization signal  
220 (**Fig 4b**). We fit a linear mixed effects model with a fixed effect of localization signal and a random  
221 intercept within each protein family, to specifically test the statistical significance of each  
222 localization signal while accounting for the variability inherent within each protein of interest. As  
223 expected, we found that cassettes clustered based on specific localization signals; while fusion to  
224 an MTS resulted in higher rankings across the board, having a NLS led to clear clustering at the  
225 bottom of the rankings. However, there was a clear ranking priority to how well each MTS  
226 performed compared to each other, with Su9 and COX8 driving high mitochondrial import, while  
227 ATG4D performed significantly worse.

228

229 Given ATG4D's uneven performance across different POIs, we next further analyzed how  
230 colocalization scores varied based on localization scores within different protein families (**Fig 4c-**  
231 **g**). Interestingly, all three MTSs were able to drive high mitochondrial import of Class I CRISPR-  
232 related proteins (**Fig 4c**), whereas both COX8 and ATG4D appeared less capable than Su9 of  
233 importing the larger Class II CRISPR nucleases (**Fig 4d**). Of the two retron RTs tested, only Su9  
234 led to mitochondrial localization of retron-Eco1 RT, whereas COX8 and ATG4D were able to  
235 localize retron Eco2 RT (**Fig 4e**). Finally, while both COX8 and Su9 were able to import all RecTs  
236 and SSBs tested into the mitochondria (**Fig 4f,g**), ATG4D instead appeared to misdirect these  
237 proteins to a different location, based on an unusual punctate pattern which did not colocalize with  
238 mitochondria (**Fig S2c**).

239

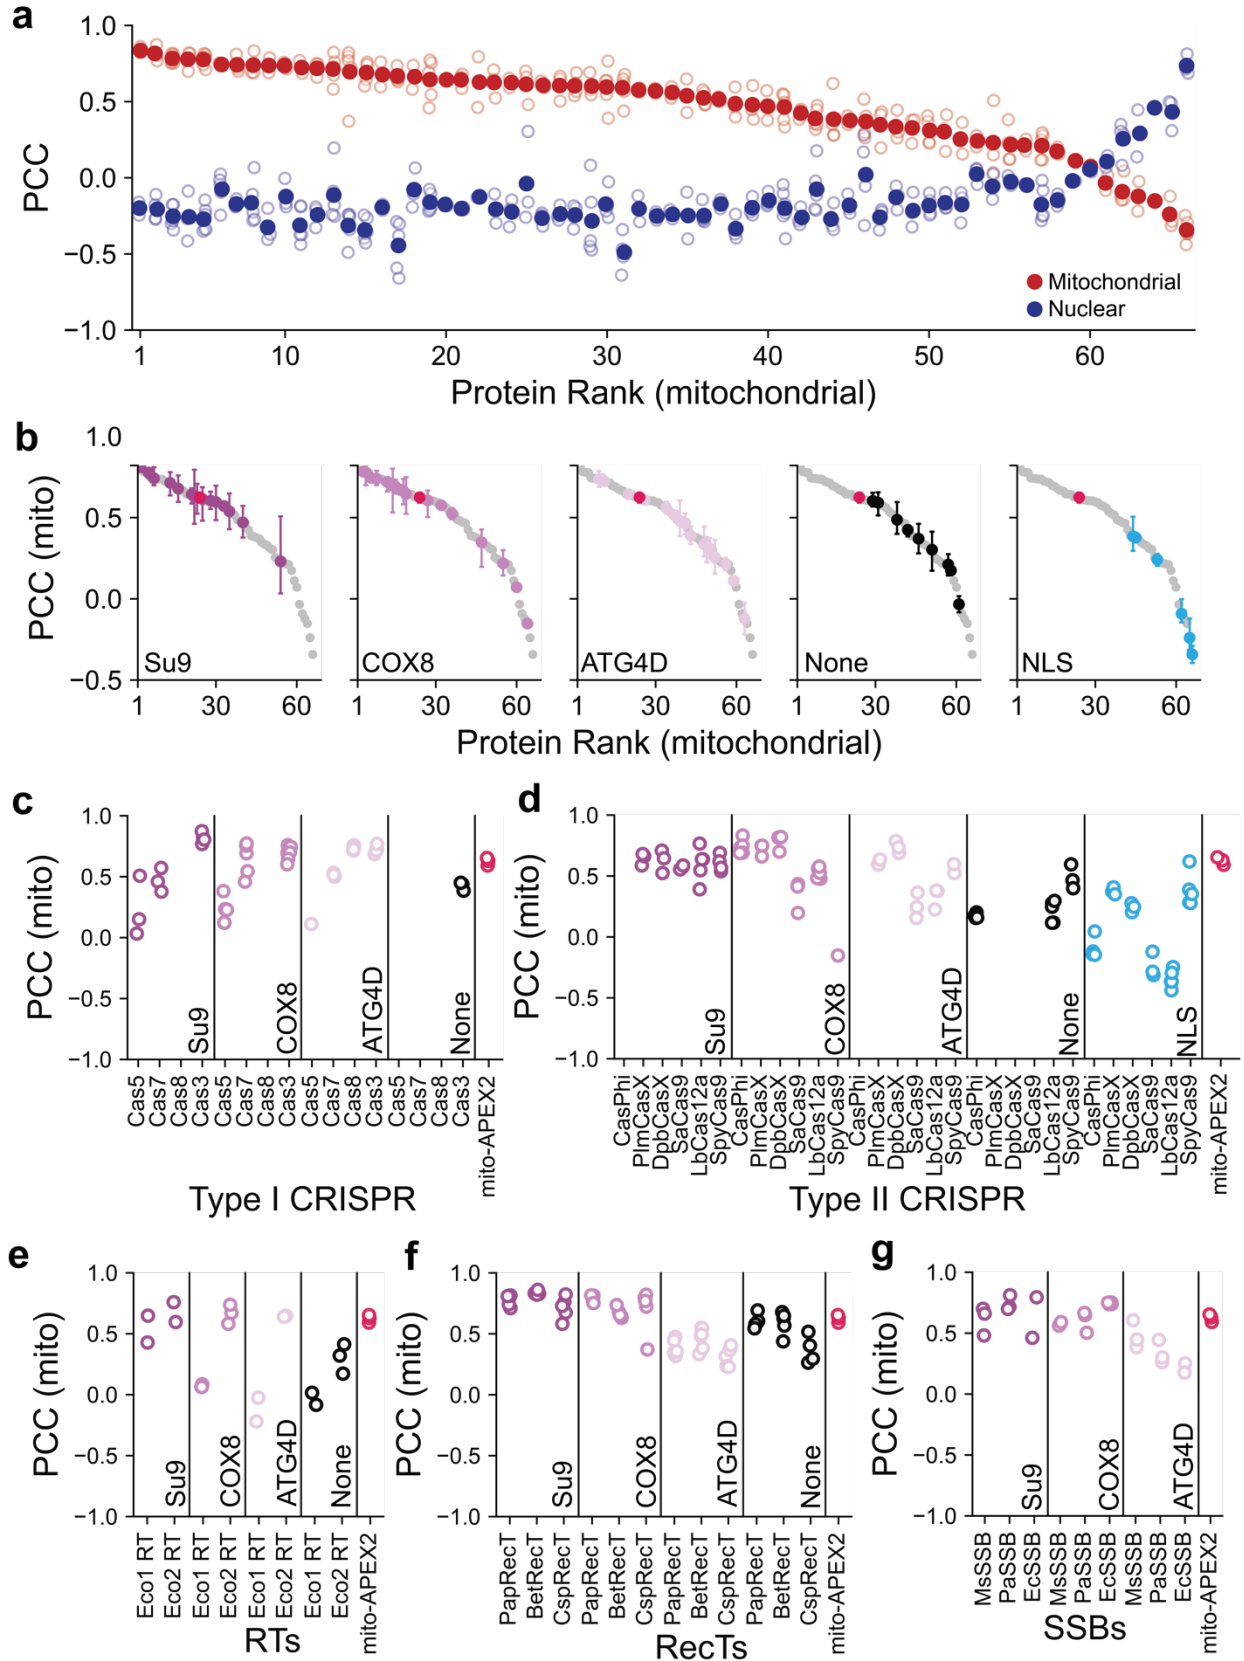

241 **Figure 4.** MTS selection strongly influences mitochondrial import. **(a)** Mitochondrial (red) and nuclear (blue)  
242 colocalization scores of 66 different protein cassettes. Proteins were ranked based on average mitochondrial  
243 colocalization score, from highest mitochondrial PCC to lowest. Open circles are biological replicates; closed  
244 circles are average of all biological replicates. **(b)** Clustering of cassettes based on specific localization signal.  
245 The entire continuum of all mitochondrial colocalization scores from (a) is shown in each subplot in gray, while  
246 the positive control mito-APEX2 is shown in each subplot in red. The clustering of cassettes with a specific  
247 localization signal is shown in another color on top (from left to right subplots: Su9, COX8, ATG4D, none, and  
248 NLS). There is a significant effect of localization signal (linear mixed effects model,  $P < 0.0001$ ), where ATG4D  
249 is significantly different from both Su9 ( $P < 0.0001$ ) and COX8 ( $P < 0.0001$ ) but not None (0.092559) during  
250 follow-up (Kenward-Roger corrected). Meanwhile, there is no significant difference between Su9 and COX8  
251 ( $P = 0.88139$ ). Closed circles indicate average of all biological replicates; error bars indicate standard deviation.  
252 **(c)-(g)** Mitochondrial colocalization scores broken down by localization signal within a given protein family (c;  
253 Class I CRISPR Cas3/CASCADE, d; Class II CRISPR nucleases, e; retron RTs, f; RecTs, g; SSBs). Specific  
254 proteins are listed in order of amino acid length, from shortest on the left to longest on the right. As a reference  
255 for mitochondrial PCC scores suggestive of mitochondrial import, scores for positive control mito-APEX2 are  
256 shown to the right of each figure (red). Open circles are individual biological replicates.

257

258

## 259 **DISCUSSION**

260 Importing non-canonical proteins into mammalian mitochondria is a critical step to overcome  
261 particular challenges in metabolic engineering and for developing therapeutics to treat genetic  
262 diseases of the mtDNA. Here, we design a high-throughput imaging-based workflow to quickly  
263 screen the subcellular localization of a tagged protein. This method enabled us to determine the  
264 best MTS-POI combination across three commonly used MTSs and five different protein classes  
265 that are components of gene editing technologies. The results from these screens should help drive  
266 more robust mitochondrial gene editing by enabling researchers to test mitochondrial gene editing  
267 using other nucleases or proteins beyond SpyCas9, which has been reported to cause mitochondrial  
268 dysfunction when imported to mitochondria<sup>15</sup>, or testing MTSs that yield more specific  
269 mitochondria import to prevent off-target effects in nuclear DNA<sup>29</sup>.

270

271 This work also reveals broader trends about which MTS to use across multiple protein types. By  
272 testing three common MTSs on a diverse set of POIs, we find that Su9 and COX8 consistently  
273 performed the best while ATG4D performed the most unevenly and misdirected several POIs to  
274 an alternate location. In addition, unlike COX8 and ATG4D, Su9 was able to import specific  
275 proteins, such as large Class II nucleases and Eco1 RT, into the mitochondria.

276

277 As a tool for the field, our Python-based workflow implemented in an annotated Jupyter notebook  
278 can be reused for future experiments, including more generally to other screens using different  
279 proteins, organelles of interest, or cell lines. Although we used a high-throughput confocal  
280 microscope in our own workflow, other confocal microscopes could easily be used, depending on  
281 the necessary throughput or number of samples. Computationally, the analytic pipeline uses  
282 Python, an open-source programming language, and relies on pixel-based colocalization analyses  
283 and quality check steps to eliminate cells not expressing a protein of interest that can be universally  
284 applied regardless of cell line or differing expression levels or phenotypes<sup>50</sup>. The only experiment-  
285 specific alteration to the pipeline would be to apply a different neural network to segment  
286 individual cells, depending on the cell line and seeding density used. However, Cellpose already  
287 offers a collection of ready-to-use neural networks or—if further refinement is necessary—an  
288 intuitive GUI that enables users to retrain and create their own neural network in fewer than 30



289 minutes<sup>49</sup>. Therefore, others should be able to easily apply this analytical framework to quantify  
290 colocalization within their own fluorescent images.

291

## 292 **Methods**

### 293 *Constructs and strains*

294 Protein cassettes were constructed by amplifying localization signals and POI nucleotide  
295 sequences using PCR from synthesized gBlocks (IDT) or existing plasmids. Complete protein  
296 cassettes were cloned into a PiggyBac integrating plasmid for doxycycline-inducible human  
297 protein expression (TetOn-3G promoter) using Gibson assembly. Alternatively, some cassettes  
298 were synthesized into the same custom PiggyBac integrating plasmid by Twist Bioscience (see  
299 Supplementary Table 2).

300

301 Stable mammalian cells for imaging were generated using the standard Lipofectamine 3000  
302 transfection protocol (Invitrogen) and a PiggyBac transposase system. T12.5 flasks with 50-70%  
303 confluent HEK293T cells were transfected using 1.6  $\mu$ g POI cassette expression plasmid and 0.8  
304  $\mu$ g PiggyBac transposase plasmid (pCMV-hyPBase). Stable cell lines were selected using  
305 puromycin for at least one week.

306

307 Clonal lines were generated by growing individual cells into separate cell populations.  
308 Specifically, stable cell lines were serially diluted to a final concentration of 2.5 cells per mL media  
309 then seeded into a 96-well plate using 100  $\mu$ L/well. Wells that received a single cell had media  
310 refreshed weekly until a clonal line proliferated to ~40% confluency, at which point a clonal line  
311 was passaged to a larger flask for further experiments.

312

### 313 *Immunocytochemistry*

314 96-well glass bottom plates with #1 cover glass (Cellvis, catalog # P96-1-N) were coated with a  
315 mixture of 50% poly-D-lysine (ThermoFisher Scientific, catalog #A3890401) and DPBS  
316 (ThermoFisher Scientific, catalog #14040133) for 30 minutes at room temperature. Wells were  
317 washed three times with distilled water and left out to dry for at least 2 hours prior to seeding.

318

319 Cells were seeded at a density of 10,000 cells per well. The following day, doxycycline was added  
320 at a final concentration of 1  $\mu$ g/mL to induce expression of the protein cassette. At 24 hours post-  
321 induction, cell nuclei were stained using a final concentration of 10  $\mu$ M Hoescht for at least 5  
322 minutes prior to fixation.

323

324 For fixation, media was aspirated from each well and replaced with a solution of 4%  
325 paraformaldehyde (PFA) created fresh by fixing a 1 mL 16% (w/v) PFA ampule (ThermoFisher  
326 Scientific, catalog #28906) with 3 mL PBS. Cells were fixed for 30 minutes at room temperature  
327 prior to three 5-minute washes with PBS. Following fixation, cells were permeabilized and blocked  
328 for an hour at room temperature using blocking buffer made fresh with the following ingredients:  
329 PBS containing 10% donkey serum (Sigma-Aldrich, catalog #D9663), 10% Triton X-100 (Sigma-  
330 Aldrich, catalog #X100), and 100 mg BSA (Sigma-Aldrich, catalog #A9418) per 10 mL solution.  
331 Next, cells were incubated overnight at 4°C in blocking buffer with the antibodies anti-HA tag  
332 conjugated to DyLight 550 (ThermoFisher Scientific, catalog #26183-D550) and anti-TIM23  
333 (Abcam, catalog #ab230253) each added at a 1:100 dilution. After performing three more 5-minute  
334 washes, cells were incubated with a secondary antibody goat anti-rabbit conjugated to DyLight

335 650 (ThermoFisher Scientific, catalog #84546) at a 1:500 dilution in blocking buffer for 3 hours.  
336 Following secondary antibody incubation, three more 5-minute washes were performed prior to  
337 the addition of 30  $\mu$ L antifade mountant (ThermoFisher Scientific, catalog #S36967) per well.  
338

339 Plates were wrapped in aluminum foil to avoid light and either stored temporarily at 4°C or at -  
340 20°C for longer-term storage prior to imaging.  
341

#### 342 *Imaging*

343 Stained cells were imaged using an ImageXpress Micro Confocal High-Content Imaging System  
344 (Molecular Devices) using a 40X water immersion objective by taking a 7-layer Z-stack, with each  
345 layer spaced 0.3  $\mu$ m apart, at four different sites per well.  
346

#### 347 *Colocalization Image Analysis Pipeline*

348 A colocalization image analysis pipeline was made using jupyter-notebook in Python 3<sup>51,52</sup>, and  
349 uses the following packages: numpy, pandas, scipy, skimage, tqdm, and tiff file. Additionally, the  
350 pipeline requires the Cellpose code library<sup>48,49</sup> along with these additional packages: numba,  
351 opencv, and pytorch. Using the Cellpose GUI also requires PyQt and pyqtgraph<sup>53</sup>.  
352

353 TIFF files consisting of merged nuclear and mitochondrial channels were created using a custom  
354 function and fed into a neural network retrained according to the instructions for the Cellpose  
355 GUI<sup>49</sup>. Briefly, the “CP” model from the Cellpose model zoo was initially used to segment all  
356 images. Afterwards, about five images with poor initial segmentation were chosen for manual  
357 annotation. The CP model was then retrained using the corrected labels and the new model was  
358 re-run on all images.  
359

360 To remove segmented cells that did not contain expression of the cassette protein, Otsu  
361 thresholding was performed on the HA channel to determine a pixel intensity threshold separating  
362 signal from background for each image. Only segmented cells containing at least 50 pixels of  
363 cassette protein signal, referred to as filtered cells, were kept for further analysis.  
364

365 Two additional functions to ensure quality-check steps were also implemented. First, any image  
366 containing fewer than six filtered cells was automatically removed from further analysis. Second,  
367 since the overall expression of a cassette protein can vary between different cell lines, a function  
368 was written to ensure that the filtering step effectively distinguished between cells that did or did  
369 not express a cassette protein. Individual cells containing noise, rather than signal, exhibit a  
370 Gaussian distribution of protein cassette pixel intensities. In contrast, cells with signal tend to  
371 exhibit non-normal or skewed pixel intensity distributions. Thus, for every image, a “non-  
372 Gaussian” test was performed on each filtered cell by testing for normality. If over 60% of filtered  
373 cells failed the “non-Gaussian” test, then this result suggests that the majority of filtered cells  
374 within the image do not contain true expression of the cassette protein, thus that specific image  
375 would be removed from further analysis.  
376

377 Afterwards, a custom function was built to calculate PCC between the HA channel pixel intensities  
378 and either the mitochondrial or nuclear channel pixel intensities for every filtered cell related to a  
379 given biological replicate. Due to the skew present in most PCC distribution, these results were  
380 summarized by taking the median of all the filtered cells for a given biological replicate.



381

382 *Statistics*

383 ANOVA and post-hoc analyses were performed using GraphPad Prism v9.4.1 For linear mixed  
384 effects modeling, we used *R* v4.2.3 using the *lme4* and *lmerTest* packages (post-hoc analyses used  
385 the Kenward-Roger degrees of freedom correction method implemented in the package *pbkrtest*).

386

387 **ABBREVIATIONS**

388 MTS: mitochondrial targeting sequence

389 POI: protein of interest

390 mtDNA: mitochondrial DNA

391 CRISPR: clustered regularly interspaced short palindromic repeats

392 **Conflict of interest statement**

393 There are no conflicts of interests.

394

395 **Acknowledgements**

396 This work was supported by the National Institute of General Medical Sciences (DP2GM140917),  
397 the National Institute of Biomedical Imaging and Bioengineering (R21EB031393), and the UCSF  
398 Program for Breakthrough Biomedical Research (partially funded by the Sandler Foundation).  
399 S.K.L. was supported by an NSF Graduate Research Fellowship (2034836). S.L.S. is a Chan  
400 Zuckerberg Biohub – San Francisco Investigator. We thank David Darevsky for his advice on  
401 coding and statistics.

402

403 **References**

- 404 (1) Agrimi, G. Role of Mitochondrial Carriers in Metabolic Engineering. *J. Bioprocess.*  
405 *Biotech.* **2014**, *04* (05). <https://doi.org/10.4172/2155-9821.1000164>.
- 406 (2) Huttanus, H. M.; Feng, X. Compartmentalized Metabolic Engineering for Biochemical and  
407 Biofuel Production. *Biotechnol. J.* **2017**, *12* (6), 1700052.  
408 <https://doi.org/10.1002/biot.201700052>.
- 409 (3) Verechshagina, N. A.; Konstantinov, Yu. M.; Kamenski, P. A.; Mazunin, I. O. Import of  
410 Proteins and Nucleic Acids into Mitochondria. *Biochem. Mosc.* **2018**, *83* (6), 643–661.  
411 <https://doi.org/10.1134/S0006297918060032>.
- 412 (4) Di Donfrancesco, A.; Massaro, G.; Di Meo, I.; Tiranti, V.; Bottani, E.; Brunetti, D. Gene  
413 Therapy for Mitochondrial Diseases: Current Status and Future Perspective. *Pharmaceutics*  
414 **2022**, *14* (6), 1287. <https://doi.org/10.3390/pharmaceutics14061287>.
- 415 (5) Farhi, M.; Marhevka, E.; Masci, T.; Marcos, E.; Eyal, Y.; Ovadis, M.; Abeliovich, H.;  
416 Vainstein, A. Harnessing Yeast Subcellular Compartments for the Production of Plant  
417 Terpenoids. *Metab. Eng.* **2011**, *13* (5), 474–481.  
418 <https://doi.org/10.1016/j.ymben.2011.05.001>.
- 419 (6) Avalos, J. L.; Fink, G. R.; Stephanopoulos, G. Compartmentalization of Metabolic  
420 Pathways in Yeast Mitochondria Improves the Production of Branched-Chain Alcohols.  
421 *Nat. Biotechnol.* **2013**, *31* (4), 335–341. <https://doi.org/10.1038/nbt.2509>.
- 422 (7) Taylor, R. W.; Turnbull, D. M. Mitochondrial DNA Mutations in Human Disease. *Nat. Rev.*  
423 *Genet.* **2005**, *6* (5), 389. <https://doi.org/10.1038/nrg1606>.
- 424 (8) Ng, Y. S.; Turnbull, D. M. Mitochondrial Disease: Genetics and Management. *J. Neurol.*  
425 **2016**, *263*, 179–191. <https://doi.org/10.1007/s00415-015-7884-3>.
- 426 (9) Artika, I. M. Allotopic Expression of Mitochondrial Genes: Basic Strategy and Progress.  
427 *Genes Dis.* **2020**, *7* (4), 578–584. <https://doi.org/10.1016/j.gendis.2019.08.001>.
- 428 (10) Bacman, S. R.; Williams, S. L.; Pinto, M.; Peralta, S.; Moraes, C. T. Specific Elimination of  
429 Mutant Mitochondrial Genomes in Patient-Derived Cells by MitoTALENs. *Nat. Med.* **2013**,  
430 *19* (9), 1111–1113. <https://doi.org/10.1038/nm.3261>.
- 431 (11) Gammage, P. A.; Rorbach, J.; Vincent, A. I.; Rebar, E. J.; Minczuk, M. Mitochondrially  
432 Targeted ZFNs for Selective Degradation of Pathogenic Mitochondrial Genomes Bearing  
433 Large-Scale Deletions or Point Mutations. *EMBO Mol. Med.* **2014**, *6* (4), 458–466.  
434 <https://doi.org/10.1002/emmm.201303672>.
- 435 (12) Reddy, P.; Ocampo, A.; Suzuki, K.; Luo, J.; Bacman, S. R.; Williams, S. L.; Sugawara, A.;  
436 Okamura, D.; Tsunekawa, Y.; Wu, J.; Lam, D.; Xiong, X.; Montserrat, N.; Esteban, C. R.;  
437 Liu, G.-H.; Sancho-Martinez, I.; Manau, D.; Civico, S.; Cardellach, F.;

- 438 del Mar O’Callaghan, M.; Campistol, J.; Zhao, H.; Campistol, J. M.; Moraes, C. T.;  
439 Izpisua Belmonte, J. C. Selective Elimination of Mitochondrial Mutations in the Germline  
440 by Genome Editing. *Cell* **2015**, *161* (3), 459–469.  
441 <https://doi.org/10.1016/j.cell.2015.03.051>.
- 442 (13) Jo, A.; Ham, S.; Lee, G. H.; Lee, Y.-I.; Kim, S.; Lee, Y.-S.; Shin, J.-H.; Lee, Y. Efficient  
443 Mitochondrial Genome Editing by CRISPR/Cas9. *BioMed Res. Int.* **2015**, *2015*, 305716.  
444 <https://doi.org/10.1155/2015/305716>.
- 445 (14) Hashimoto, M.; Bacman, S. R.; Peralta, S.; Falk, M. J.; Chomyn, A.; Chan, D. C.; Williams,  
446 S. L.; Moraes, C. T. MitoTALEN: A General Approach to Reduce Mutant MtDNA Loads  
447 and Restore Oxidative Phosphorylation Function in Mitochondrial Diseases. *Mol. Ther.*  
448 **2015**, *23* (10), 1592–1599. <https://doi.org/10.1038/mt.2015.126>.
- 449 (15) Antón, Z.; Mullally, G.; Ford, H. C.; van der Kamp, M. W.; Szczelkun, M. D.; Lane, J. D.  
450 Mitochondrial Import, Health and MtDNA Copy Number Variability Seen When Using  
451 Type II and Type V CRISPR Effectors. *J. Cell Sci.* **2020**, *133* (18), jcs248468.  
452 <https://doi.org/10.1242/jcs.248468>.
- 453 (16) Mok, B. Y.; de Moraes, M. H.; Zeng, J.; Bosch, D. E.; Kotrys, A. V.; Raguram, A.; Hsu, F.;  
454 Radey, M. C.; Peterson, S. B.; Mootha, V. K.; Mougous, J. D.; Liu, D. R. A Bacterial  
455 Cytidine Deaminase Toxin Enables CRISPR-Free Mitochondrial Base Editing. *Nature*  
456 **2020**. <https://doi.org/10.1038/s41586-020-2477-4>.
- 457 (17) Hussain, S.-R. A.; Yalvac, M. E.; Khoo, B.; Eckardt, S.; McLaughlin, K. J. Adapting  
458 CRISPR/Cas9 System for Targeting Mitochondrial Genome. *Front. Genet.* **2021**, *12*.  
459 <https://doi.org/10.3389/fgene.2021.627050>.
- 460 (18) Bi, R.; Li, Y.; Xu, M.; Zheng, Q.; Zhang, D.-F.; Li, X.; Ma, G.; Xiang, B.; Zhu, X.; Zhao,  
461 H.; Huang, X.; Zheng, P.; Yao, Y.-G. Direct Evidence of CRISPR-Cas9-Mediated  
462 Mitochondrial Genome Editing. *The Innovation* **2022**, *3* (6).  
463 <https://doi.org/10.1016/j.xinn.2022.100329>.
- 464 (19) Chacinska, A.; Koehler, C. M.; Milenkovic, D.; Lithgow, T.; Pfanner, N. Importing  
465 Mitochondrial Proteins: Machineries and Mechanisms. *Cell* **2009**, *138* (4), 628–644.  
466 <https://doi.org/10.1016/j.cell.2009.08.005>.
- 467 (20) Wiedemann, N.; Pfanner, N. Mitochondrial Machineries for Protein Import and Assembly.  
468 *Annu. Rev. Biochem.* **2017**, *86* (1), 685–714. <https://doi.org/10.1146/annurev-biochem-060815-014352>.
- 470 (21) Fukasawa, Y.; Tsuji, J.; Fu, S.-C.; Tomii, K.; Horton, P.; Imai, K. MitoFates: Improved  
471 Prediction of Mitochondrial Targeting Sequences and Their Cleavage Sites. *Mol. Cell.*  
472 *Proteomics MCP* **2015**, *14* (4), 1113–1126. <https://doi.org/10.1074/mcp.M114.043083>.
- 473 (22) Savojardo, C.; Martelli, P. L.; Fariselli, P.; Casadio, R. TPpred3 Detects and Discriminates  
474 Mitochondrial and Chloroplastic Targeting Peptides in Eukaryotic Proteins. *Bioinformatics*  
475 **2015**, *31* (20), 3269–3275. <https://doi.org/10.1093/bioinformatics/btv367>.
- 476 (23) Almagro Armenteros, J. J.; Salvatore, M.; Emanuelsson, O.; Winther, O.; von Heijne, G.;  
477 Elofsson, A.; Nielsen, H. Detecting Sequence Signals in Targeting Peptides Using Deep  
478 Learning. *Life Sci. Alliance* **2019**, *2* (5), e201900429.  
479 <https://doi.org/10.26508/lsa.201900429>.
- 480 (24) Bayne, A. N.; Dong, J.; Amiri, S.; Farhan, S. M. K.; Trempe, J.-F. MTSviewer: A Database  
481 to Visualize Mitochondrial Targeting Sequences, Cleavage Sites, and Mutations on Protein  
482 Structures. bioRxiv November 16, 2022, p 2021.11.25.470064.  
483 <https://doi.org/10.1101/2021.11.25.470064>.

- 484 (25) Van Steeg, H.; Oudshoorn, P.; Van Hell, B.; Polman, J. E.; Grivell, L. A. Targeting  
485 Efficiency of a Mitochondrial Pre-Sequence Is Dependent on the Passenger Protein. *EMBO*  
486 *J.* **1986**, 5 (13), 3643–3650. <https://doi.org/10.1002/j.1460-2075.1986.tb04694.x>.
- 487 (26) Oca-Cossio, J.; Kenyon, L.; Hao, H.; Moraes, C. T. Limitations of Allotopic Expression of  
488 Mitochondrial Genes in Mammalian Cells. *Genetics* **2003**, 165 (2), 707–720.  
489 <https://doi.org/10.1093/genetics/165.2.707>.
- 490 (27) Perales-Clemente, E.; Fernández-Silva, P.; Acín-Pérez, R.; Pérez-Martos, A.; Enríquez, J.  
491 A. Allotopic Expression of Mitochondrial-Encoded Genes in Mammals: Achieved Goal,  
492 Undemonstrated Mechanism or Impossible Task? *Nucleic Acids Res.* **2011**, 39 (1), 225–  
493 234. <https://doi.org/10.1093/nar/gkq769>.
- 494 (28) Bader, G.; Enkler, L.; Araisio, Y.; Hemmerle, M.; Binko, K.; Baranowska, E.; De Craene,  
495 J.-O.; Ruer-Laventie, J.; Pieters, J.; Tribouillard-Tanvier, D.; Senger, B.; di Rago, J.-P.;  
496 Friant, S.; Kucharczyk, R.; Becker, H. D. Assigning Mitochondrial Localization of Dual  
497 Localized Proteins Using a Yeast Bi-Genomic Mitochondrial-Split-GFP. *eLife* **2020**, 9,  
498 e56649. <https://doi.org/10.7554/eLife.56649>.
- 499 (29) Wei, Y.; Li, Z.; Xu, K.; Feng, H.; Xie, L.; Li, D.; Zuo, Z.; Zhang, M.; Xu, C.; Yang, H.;  
500 Zuo, E. Mitochondrial Base Editor DdCBE Causes Substantial DNA Off-Target Editing in  
501 Nuclear Genome of Embryos. *Cell Discov.* **2022**, 8 (1), 1–4.  
502 <https://doi.org/10.1038/s41421-022-00391-5>.
- 503 (30) Galanis, M.; Devenish, R. J.; Nagley, P. Duplication of Leader Sequence for Protein  
504 Targeting to Mitochondria Leads to Increased Import Efficiency. *FEBS Lett.* **1991**, 282 (2),  
505 425–430. [https://doi.org/10.1016/0014-5793\(91\)80529-C](https://doi.org/10.1016/0014-5793(91)80529-C).
- 506 (31) Claros, M. G.; Perea, J.; Shu, Y.; Samatey, F. A.; Popot, J.-L.; Jacq, C. Limitations to in  
507 Vivo Import of Hydrophobic Proteins into Yeast Mitochondria. *Eur. J. Biochem.* **1995**, 228  
508 (3), 762–771. <https://doi.org/10.1111/j.1432-1033.1995.0762m.x>.
- 509 (32) Wilcox, A. J.; Choy, J.; Bustamante, C.; Matouschek, A. Effect of Protein Structure on  
510 Mitochondrial Import. *Proc. Natl. Acad. Sci.* **2005**, 102 (43), 15435–15440.  
511 <https://doi.org/10.1073/pnas.0507324102>.
- 512 (33) Chin, R. M.; Panavas, T.; Brown, J. M.; Johnson, K. K. Optimized Mitochondrial Targeting  
513 of Proteins Encoded by Modified MRNAs Rescues Cells Harboring Mutations in MtATP6.  
514 *Cell Rep.* **2018**, 22 (11), 2818–2826. <https://doi.org/10.1016/j.celrep.2018.02.059>.
- 515 (34) Rizzuto, R.; Simpson, A. W. M.; Brini, M.; Pozzan, T. Rapid Changes of Mitochondrial  
516 Ca<sup>2+</sup> Revealed by Specifically Targeted Recombinant Aequorin. *Nature* **1992**, 358 (6384),  
517 325–327. <https://doi.org/10.1038/358325a0>.
- 518 (35) Hartl, F.-U.; Pfanner, N.; Nicholson, D. W.; Neupert, W. Mitochondrial Protein Import.  
519 *Biochim. Biophys. Acta BBA - Rev. Biomembr.* **1989**, 988 (1), 1–45.  
520 [https://doi.org/10.1016/0304-4157\(89\)90002-6](https://doi.org/10.1016/0304-4157(89)90002-6).
- 521 (36) Betin, V. M. S.; MacVicar, T. D. B.; Parsons, S. F.; Anstee, D. J.; Lane, J. D. A Cryptic  
522 Mitochondrial Targeting Motif in Atg4D Links Caspase Cleavage with Mitochondrial  
523 Import and Oxidative Stress. *Autophagy* **2012**, 8 (4), 664–676.  
524 <https://doi.org/10.4161/auto.19227>.
- 525 (37) Csörgő, B.; León, L. M.; Chau-Ly, I. J.; Vasquez-Rifo, A.; Berry, J. D.; Mahendra, C.;  
526 Crawford, E. D.; Lewis, J. D.; Bondy-Denomy, J. A Compact Cascade-Cas3 System for  
527 Targeted Genome Engineering. *Nat. Methods* **2020**, 17 (12), 1183–1190.  
528 <https://doi.org/10.1038/s41592-020-00980-w>.

- 529 (38) Makarova, K. S.; Wolf, Y. I.; Iranzo, J.; Shmakov, S. A.; Alkhnbashi, O. S.; Brouns, S. J.  
530 J.; Charpentier, E.; Cheng, D.; Haft, D. H.; Horvath, P.; Moineau, S.; Mojica, F. J. M.;  
531 Scott, D.; Shah, S. A.; Siksnys, V.; Terns, M. P.; Venclovas, Č.; White, M. F.; Yakunin, A.  
532 F.; Yan, W.; Zhang, F.; Garrett, R. A.; Backofen, R.; van der Oost, J.; Barrangou, R.;  
533 Koonin, E. V. Evolutionary Classification of CRISPR–Cas Systems: A Burst of Class 2 and  
534 Derived Variants. *Nat. Rev. Microbiol.* **2020**, *18* (2), 67–83. [https://doi.org/10.1038/s41579-](https://doi.org/10.1038/s41579-019-0299-x)  
535 [019-0299-x](https://doi.org/10.1038/s41579-019-0299-x).
- 536 (39) DiCarlo, J. E.; Conley, A. J.; Penttilä, M.; Jääntti, J.; Wang, H. H.; Church, G. M. Yeast  
537 Oligo-Mediated Genome Engineering (YOGE). *ACS Synth. Biol.* **2013**, *2* (12), 741–749.  
538 <https://doi.org/10.1021/sb400117c>.
- 539 (40) Barbieri, E. M.; Muir, P.; Akhuetie-Oni, B. O.; Yellman, C. M.; Isaacs, F. J. Precise Editing  
540 at DNA Replication Forks Enables Multiplex Genome Engineering in Eukaryotes. *Cell*  
541 **2017**, *171* (6), 1453–1467.e13. <https://doi.org/10.1016/j.cell.2017.10.034>.
- 542 (41) Wannier, T. M.; Nyerges, A.; Kuchwara, H. M.; Czikkely, M.; Balogh, D.; Filsinger, G. T.;  
543 Borders, N. C.; Gregg, C. J.; Lajoie, M. J.; Rios, X.; Pál, C.; Church, G. M. Improved  
544 Bacterial Recombineering by Parallelized Protein Discovery. *Proc. Natl. Acad. Sci.* **2020**,  
545 *117* (24), 13689–13698. <https://doi.org/10.1073/pnas.2001588117>.
- 546 (42) Filsinger, G. T.; Wannier, T. M.; Pedersen, F. B.; Lutz, I. D.; Zhang, J.; Stork, D. A.;  
547 Debnath, A.; Gozzi, K.; Kuchwara, H.; Volf, V.; Wang, S.; Rios, X.; Gregg, C. J.; Lajoie,  
548 M. J.; Shipman, S. L.; Aach, J.; Laub, M. T.; Church, G. M. Characterizing the Portability  
549 of Phage-Encoded Homologous Recombination Proteins. *Nat. Chem. Biol.* **2021**, *17* (4),  
550 394–402. <https://doi.org/10.1038/s41589-020-00710-5>.
- 551 (43) Kong, X.; Wang, Z.; Zhang, R.; Wang, X.; Zhou, Y.; Shi, L.; Yang, H. Precise Genome  
552 Editing without Exogenous Donor DNA via Retron Editing System in Human Cells.  
553 *Protein Cell* **2021**, *12* (11), 899–902. <https://doi.org/10.1007/s13238-021-00862-7>.
- 554 (44) Schubert, M. G.; Goodman, D. B.; Wannier, T. M.; Kaur, D.; Farzadfard, F.; Lu, T. K.;  
555 Shipman, S. L.; Church, G. M. High-Throughput Functional Variant Screens via in Vivo  
556 Production of Single-Stranded DNA. *Proc. Natl. Acad. Sci.* **2021**, *118* (18), e2018181118.  
557 <https://doi.org/10.1073/pnas.2018181118>.
- 558 (45) Zhao, B.; Chen, S.-A. A.; Lee, J.; Fraser, H. B. Bacterial Retrons Enable Precise Gene  
559 Editing in Human Cells. *CRISPR J.* **2022**, *5* (1), 31–39.  
560 <https://doi.org/10.1089/crispr.2021.0065>.
- 561 (46) Lopez, S. C.; Crawford, K. D.; Lear, S. K.; Bhattarai-Kline, S.; Shipman, S. L. Precise  
562 Genome Editing across Kingdoms of Life Using Retron-Derived DNA. *Nat. Chem. Biol.*  
563 **2022**, *18* (2), 199–206. <https://doi.org/10.1038/s41589-021-00927-y>.
- 564 (47) Rhee, H.-W.; Zou, P.; Udeshi, N. D.; Martell, J. D.; Mootha, V. K.; Carr, S. A.; Ting, A. Y.  
565 Proteomic Mapping of Mitochondria in Living Cells via Spatially Restricted Enzymatic  
566 Tagging. *Science* **2013**, *339* (6125), 1328–1331. <https://doi.org/10.1126/science.1230593>.
- 567 (48) Stringer, C.; Wang, T.; Michaelos, M.; Pachitariu, M. Cellpose: A Generalist Algorithm for  
568 Cellular Segmentation. *Nat. Methods* **2021**, *18* (1), 100–106.  
569 <https://doi.org/10.1038/s41592-020-01018-x>.
- 570 (49) Pachitariu, M.; Stringer, C. Cellpose 2.0: How to Train Your Own Model. *Nat. Methods*  
571 **2022**, *19* (12), 1634–1641. <https://doi.org/10.1038/s41592-022-01663-4>.
- 572 (50) Dunn, K. W.; Kamocka, M. M.; McDonald, J. H. A Practical Guide to Evaluating  
573 Colocalization in Biological Microscopy. *Am. J. Physiol. Cell Physiol.* **2011**, *300* (4),  
574 C723–742. <https://doi.org/10.1152/ajpcell.00462.2010>.

- 575 (51) Van Rossum, G.; Drake, F. L. *Python 3 Reference Manual*; CreateSpace: Scotts Valley,  
576 CA, 2009.
- 577 (52) Kluyver, T.; Ragan-Kelley, B.; Pérez, F.; Granger, B.; Bussonnier, M.; Frederic, J.; Kelley,  
578 K.; Hamrick, J.; Grout, J.; Corlay, S.; Ivanov, P.; Avila, D.; Abdalla, S.; Willing, C.;  
579 Jupyter development team. Jupyter Notebooks – a Publishing Format for Reproducible  
580 Computational Workflows; Loizides, F., Schmidt, B., Eds.; IOS Press, 2016; pp 87–90.  
581 <https://doi.org/10.3233/978-1-61499-649-1-87>.
- 582 (53) Summerfield, M. *Rapid GUI Programming with Python and Qt: The Definitive Guide to*  
583 *PyQt Programming*. **2007**.
- 584
